# Supplementary material for: Gu-Ben-Fang-Xiao Decoction Ameliorated Murine Asthma in Remission Stage by Modulating Microbiota-Acetate-Tregs Axis
Source: PubMed Central journal article supplement (PMC7212778; doi:10.3389/fphar.2020.00549), 2020-05-04

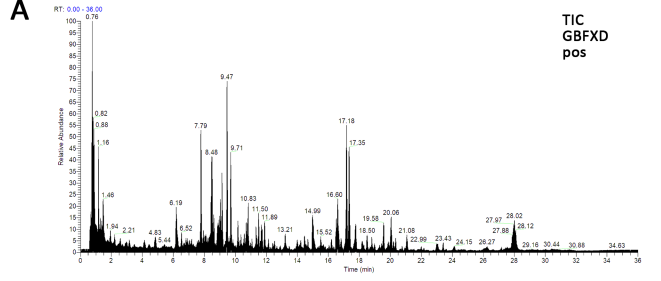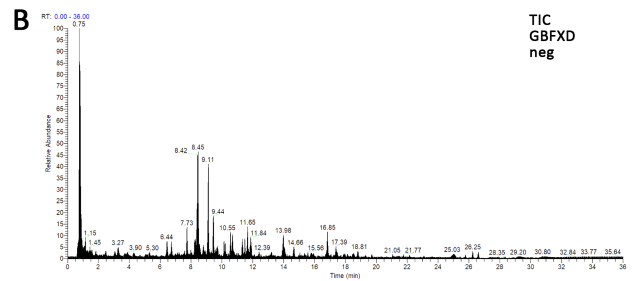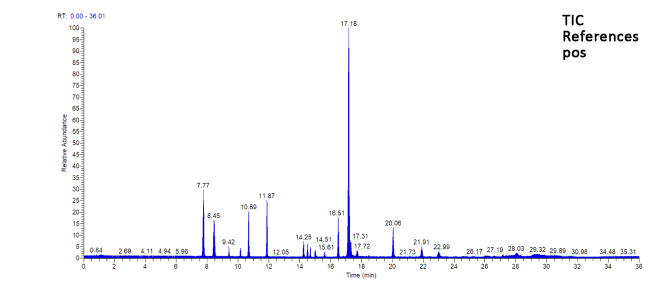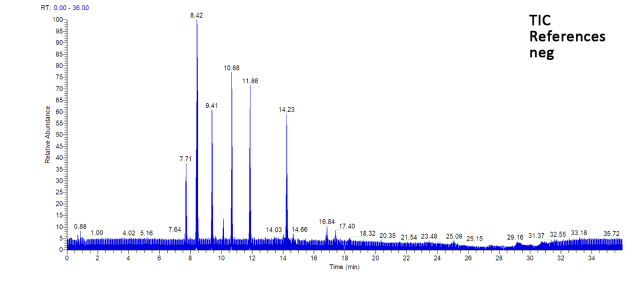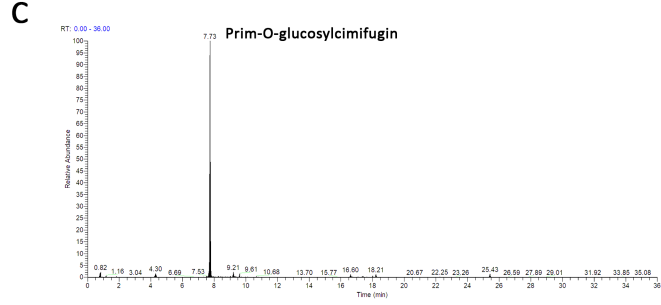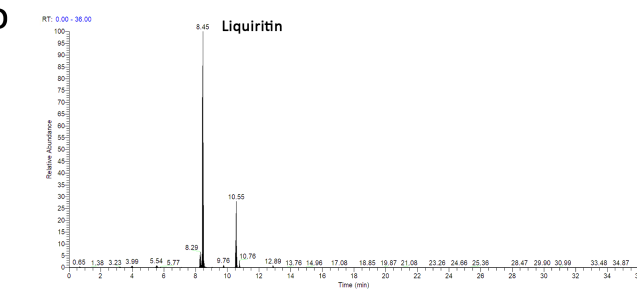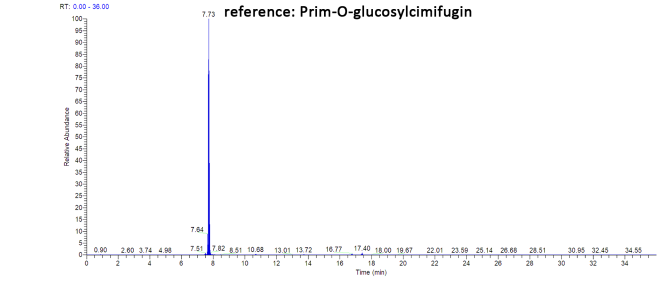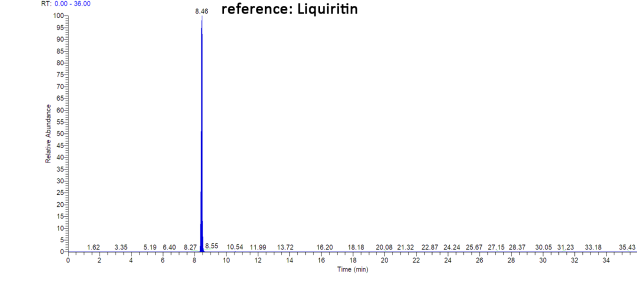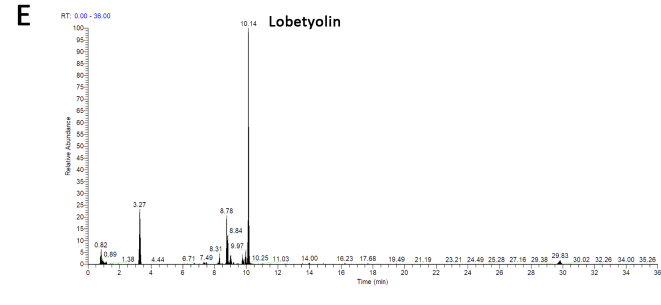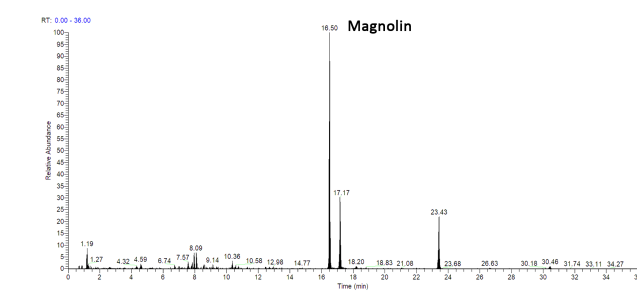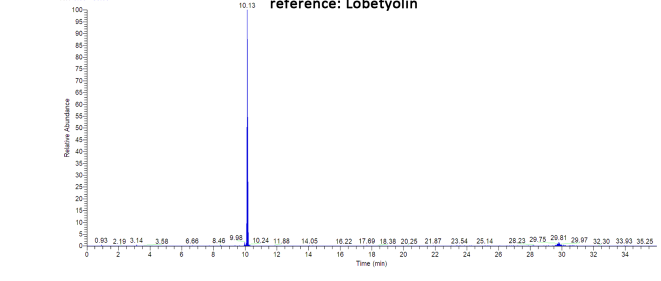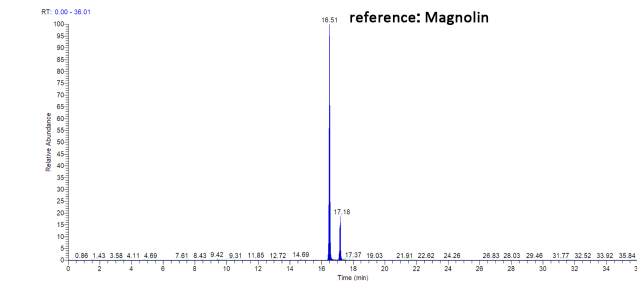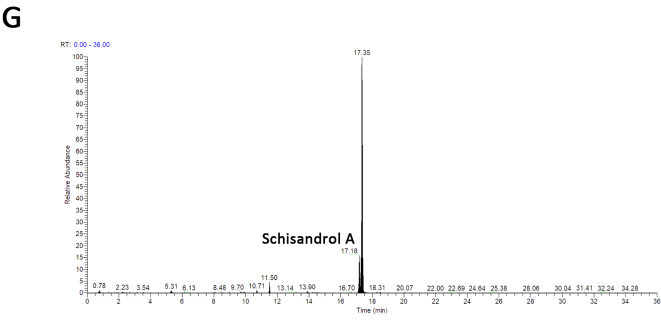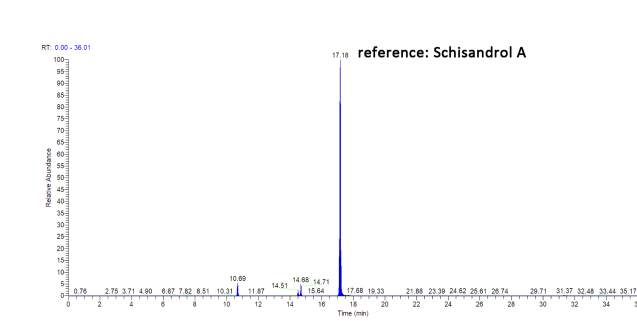

Supplement: Image_1.pdf [file Image_1.pdf]
