# Supplementary material for: Gu-Ben-Fang-Xiao Decoction Ameliorated Murine Asthma in Remission Stage by Modulating Microbiota-Acetate-Tregs Axis
Source: PubMed Central journal article supplement (PMC7212778; doi:10.3389/fphar.2020.00549), 2020-05-04

**A**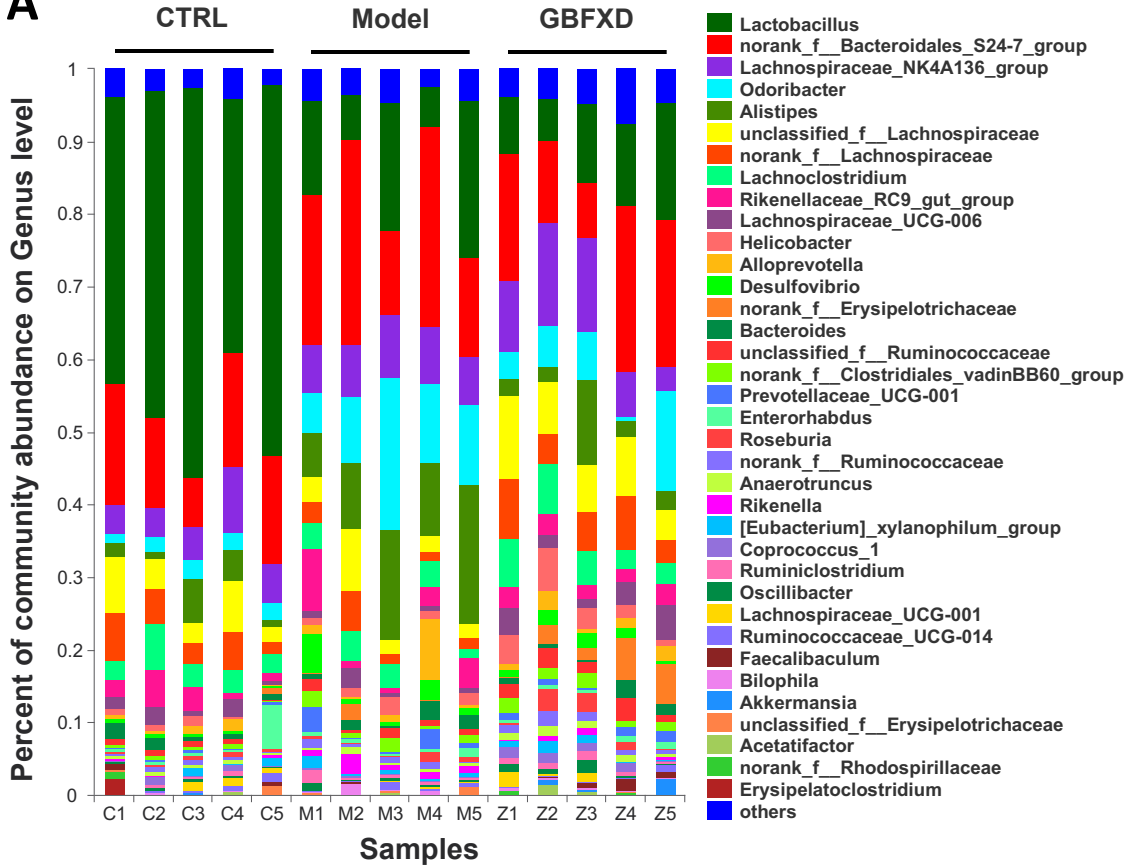

**B**

## Wilcoxon rank-sum test bar plot on Family level

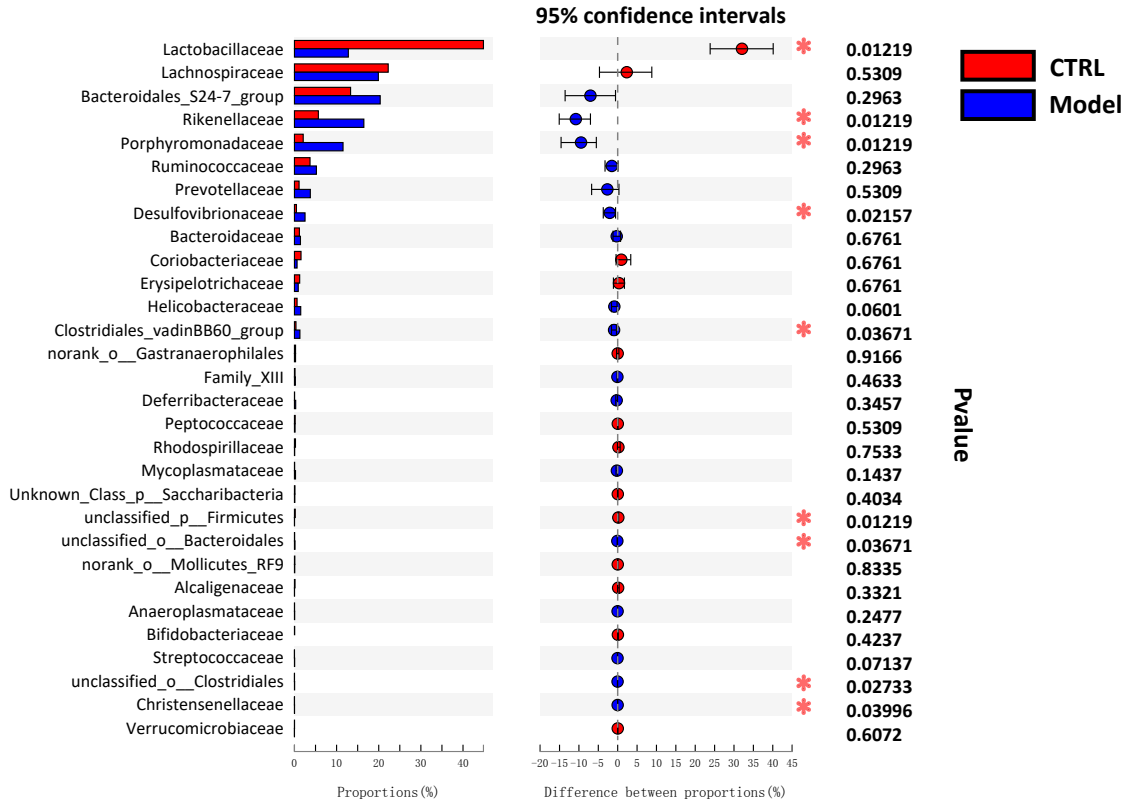**C**

## Wilcoxon rank-sum test bar plot on Family level

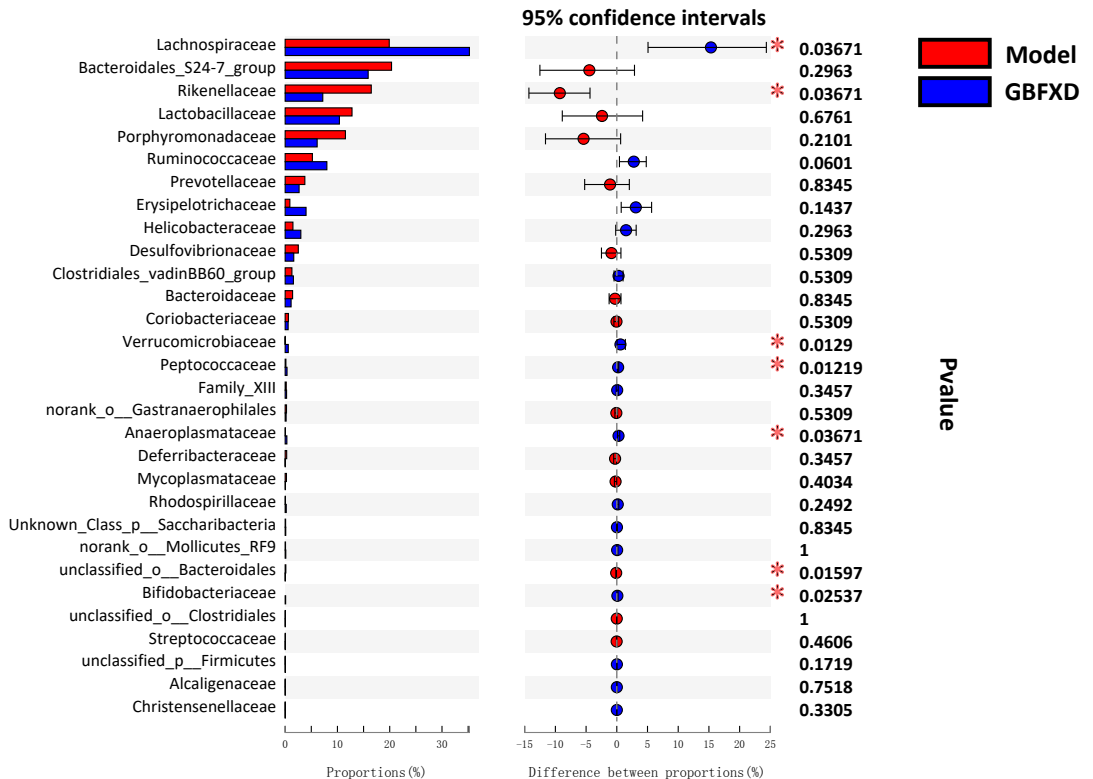

Supplement: Image_2.pdf [file Image_2.pdf]
